# Supplementary material
Source: HighWire-hosted journal article supplement (https://gut.bmj.com/content/71/4/746)
Supplement: inline-supplementary-material-1 [file inline-supplementary-material-1.pdf]

## Supplementary material

**Table S1** Univariate analysis for clinical predictors of detectable IgG antibodies against nucleocapsid-protein of SARS-CoV-2 in liver transplant patients

|                                               | OR            | 95% CI               | p-value      |
|-----------------------------------------------|---------------|----------------------|--------------|
| <b>Age (years)</b>                            | <b>1.073</b>  | <b>1.008 – 1.143</b> | <b>0.028</b> |
| Male gender                                   | 0.205         | 0.036 – 1.175        | 0.075        |
| Time from infection to serology (weeks)       | 0.992         | 0.794 – 1.239        | 0.943        |
| Time from transplantation to serology (years) | 1.041         | 0.911 – 1.189        | 0.557        |
| Hypertension                                  | 1.875         | 0.309 – 11.372       | 0.494        |
| Chronic kidney disease                        | 0.833         | 0.131 – 5.297        | 0.847        |
| Calcineurin inhibitors                        | 0             | 0                    |              |
| Mycophenolate                                 | 0.300         | 0.054 – 1.653        | 0.167        |
| mTOR inhibitors                               | 0             | 0                    |              |
| Steroids                                      | 0.222         | 0.036 – 1.390        | 0.108        |
| ≥2 immunosuppressive agents                   | 1.000         | 0.188 – 5.332        | 1.000        |
| ACE inhibitors/ARB's                          | 1.184         | 0.192-7.320          | 0.856        |
| <b>PSC/PBC/AIH</b>                            | <b>0.048</b>  | <b>0.006 – 0.366</b> | <b>0.003</b> |
| Positive IgG anti-spike antibodies            | 0             | 0                    |              |
| <b>Presence of neutralizing ability</b>       | <b>67.500</b> | <b>5.099-893.366</b> | <b>0.001</b> |

Abbreviation list: OR, odds ratio; 95% CI, 95% confidence interval; PSC, primary sclerosing cholangitis; PBC, primary biliary cholangitis; AIH, auto-immune hepatitis; mTOR, mammalian target of rapamycin; ACE, angiotensin converting enzyme.

**Table S2** Univariate analysis for clinical predictors of presence of neutralizing ability of antibodies against SARS-CoV-2 in liver transplant patients

|                                                  | OR          | 95% CI               | p-value      |
|--------------------------------------------------|-------------|----------------------|--------------|
| Age (years)                                      | 1.038       | 0.978-1.102          | 0.215        |
| Male gender                                      | 0.130       | 0.019 – 0.890        | 0.038        |
| Time from infection to serology (weeks)          | 1.088       | 0.828-1.430          | 0.545        |
| Time from transplantation to serology (years)    | 0.986       | 0.871-1.117          | 0.827        |
| Hypertension                                     | 4.062       | 0.420-39.257         | 0.226        |
| Chronic kidney disease                           | 1.905       | 0.192-18.928         | 0.582        |
| Calcineurin inhibitors                           | 0           | 0                    |              |
| Mycophenolate mofetil                            | 1.053       | 0.164-6.776          | 0.957        |
| mTOR inhibitors                                  | 0           | 0                    |              |
| Steroids                                         | 0.417       | 0.059-2.934          | 0.379        |
| ≥2 immunosuppressive agents                      | 0.306       | 0.048-1.954          | 0.210        |
| ACE inhibitors/ARB's                             | 2.632       | 0.269-25.715         | 0.405        |
| PSC/PBC/AIH                                      | 0.080       | 0.011-0.590          | 0.013        |
| <b>Positive IgG anti-nucleocapsid antibodies</b> | <b>67.5</b> | <b>5.099-893.633</b> | <b>0.001</b> |
| Positive IgG anti-spike antibodies               | 0           | 0                    |              |

**Table S3:** Characteristics of the patients with negative anti-nucleocapsid IgG antibodies in the study group

| Underlying liver etiology | Time from infection to serology (weeks) | Time from transplant to serology (y) | Immunosuppressive agents            | Symptoms COVID-19                        | IgG against nucleocapsid protein | Total Ig against spike protein | Neutralizing antibodies against SARS-Cov-2 |
|---------------------------|-----------------------------------------|--------------------------------------|-------------------------------------|------------------------------------------|----------------------------------|--------------------------------|--------------------------------------------|
| PSC                       | 7.1                                     | 0.6                                  | Tacrolimus                          | None                                     | Negative (0.02)                  | Negative (0.043)               | Negative                                   |
| Polycystic liver disease  | 12.9                                    | 6.5                                  | Tacrolimus, Mycophenolate, steroids | Conjunctivitis, anosmia/dysgeusia        | Negative (1.37)                  | Positive (18.26)               | Positive (60)                              |
| Cryptogenic cirrhosis     | 15.0                                    | 21.4                                 | Tacrolimus                          | Fever, cough, fatigue, anosmia/dysgeusia | Negative (0.64)                  | Positive (18.26)               | Negative                                   |
| AIH                       | 5.8                                     | 0.3                                  | Tacrolimus, Mycophenolate, Steroids | Sneezing                                 | Negative (1.22)                  | Positive (17.05)               | Positive (10)                              |
| AIH                       | 4.3                                     | 0.9                                  | Tacrolimus, Steroids                | None                                     | Negative (1.02)                  | Positive (18.3)                | Negative                                   |
| PSC                       | 4.9                                     | 5.6                                  | Tacrolimus, Mycophenolate           | Fatigue                                  | Negative (0.19)                  | Positive (17.0)                | Negative                                   |
| PBC                       | 6.0                                     | 7.4                                  | Tacrolimus, Mycophenolate           | Cough, fatigue, diarrhea, headache       | Negative (0.08)                  | Positive (18.26)               | Negative                                   |

| Case | Sex (m/f) | Age (y) | BMI, kg/m <sup>2</sup> | Comorbidity                          |
|------|-----------|---------|------------------------|--------------------------------------|
| 1    | m         | 24      | 23.5                   | -                                    |
| 2    | m         | 56      | 19.7                   | Hypertension, chronic kidney disease |
| 3    | f         | 29      | 21.1                   | -                                    |
| 4    | f         | 33      | 20.9                   | -                                    |
| 5    | M         | 55      | 24.6                   | -                                    |
| 6    | f         | 49      | 24.6                   | History of HCC                       |
| 7    | F         | 73      | 18.2                   | Hypertension, chronic kidney disease |

Abbreviation: HCC, hepatocellular carcinoma; PSC, primary sclerosing cholangitis; PBC, primary biliary cholangitis; AIH, autoimmune hepatitis.

**Figure S1:** A) IgG levels against nucleocapsid-protein and B) total-Ig levels against spike-protein in relation to time since COVID-19 diagnosis in the COVID-LT cohort and in COVID-immunocompetent cohort

A)

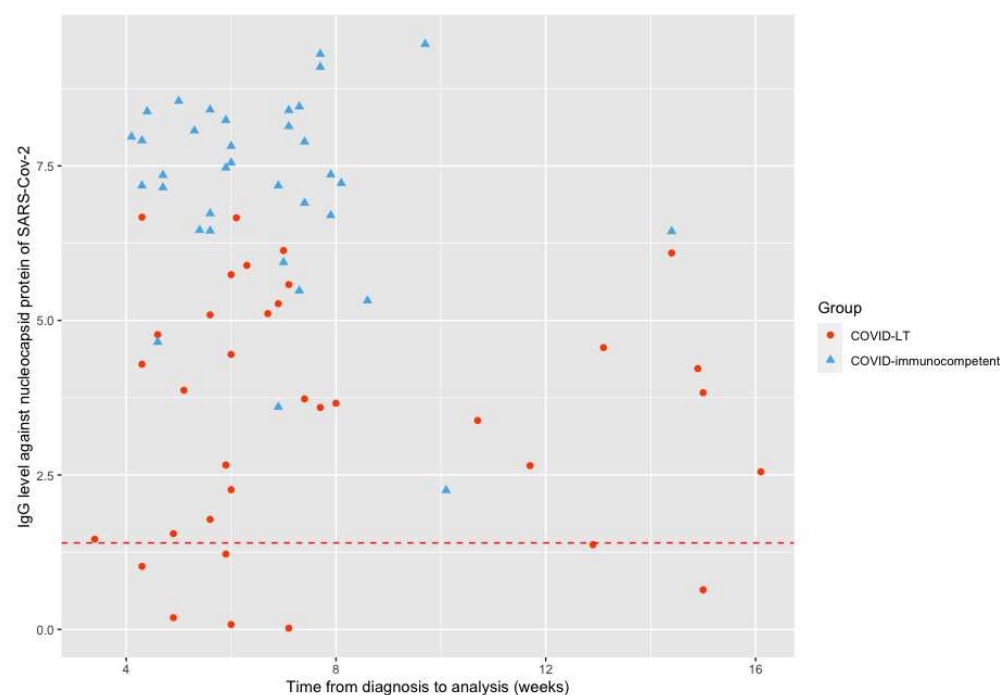

B)

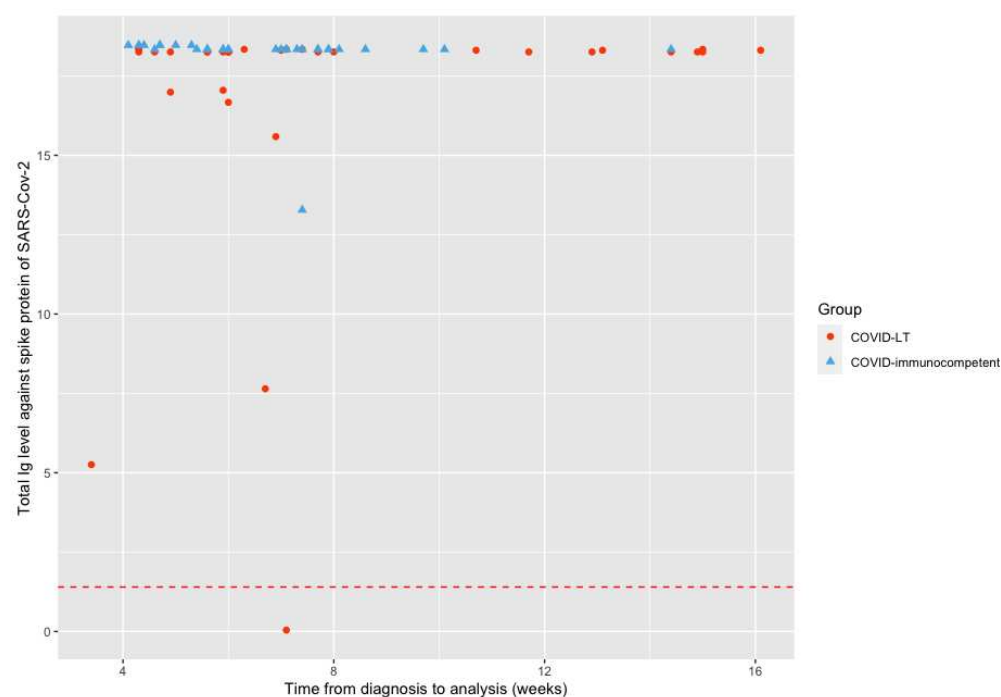

**Figure S2:** IgG level against nucleocapsid-protein according to age in the COVID-LT cohort and in COVID- immunocompetent cohort

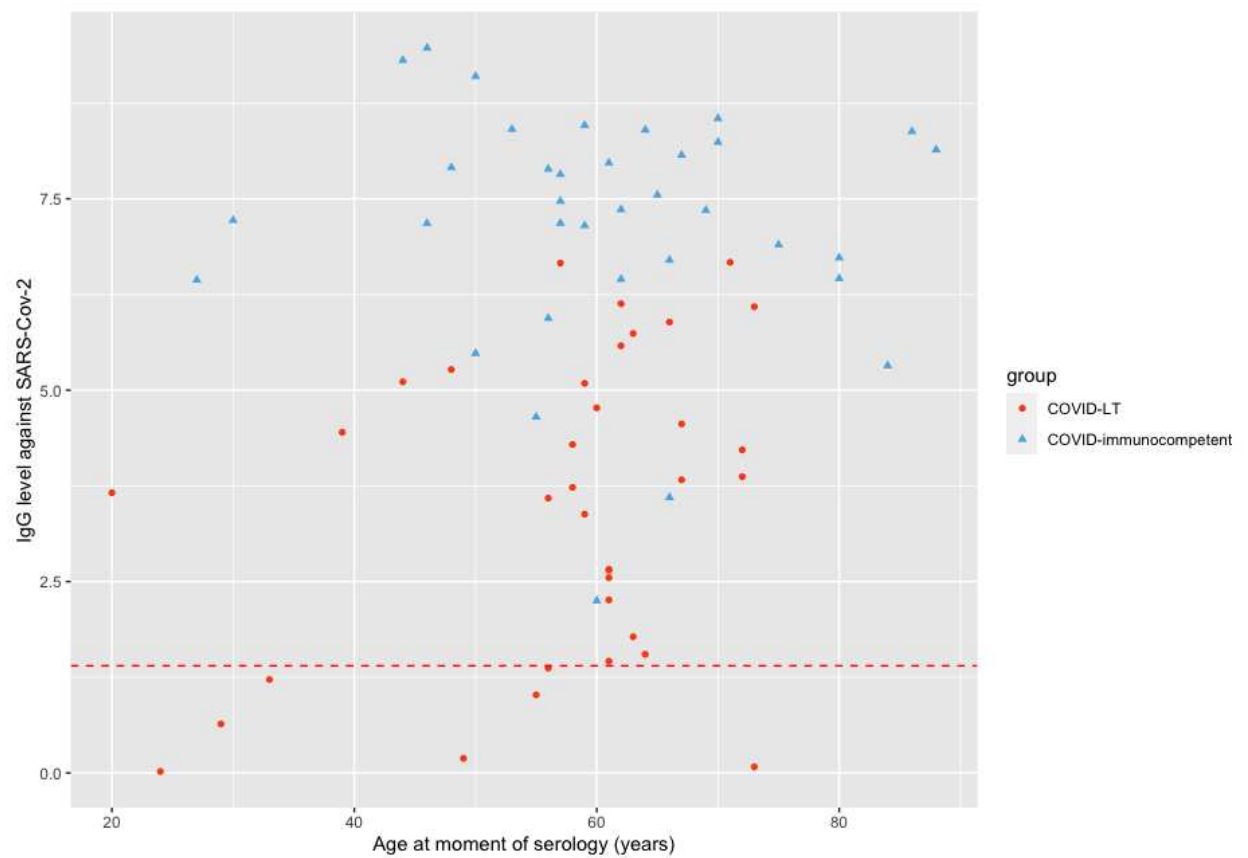

**Appendix A.** Questionnaire to rule out COVID-19 symptoms in the non-COVID LT cohort.

## Inventory of symptoms and risk for Corona

---

### PART 1

---

#### General

1. What is your height?

..... cm

2. What is your body weight?

..... kg

3. Did you receive a seasonal flu shot last year?

☐ Yes    ☐ No    ☐ I do not know

#### Live and work

1. How many members are in your household (yourself included)?

.....

1a. How many members in your household are in the age of 0-12 years?

.....

1b. How many members in your household are in the age of 13-17 year?

.....

1c. How many members in your household are in the age of 18-29 year?

.....

1d. How many members in your household are in the age of 30-59 year?

.....

1e. How many members in your household are over the age of 60 year?

.....

2. Do you currently work outdoors?

☐ Yes    ☐ No

3. Did you work during de peak of the corona outbreak outdoors?

☐ Yes    ☐ No

4. Do you work in healthcare?

☐ Yes    ☐ No

5. Is one of your household members still working outdoors?

☐ Yes    ☐ No

6. Is one of your household members working in healthcare?

☐ Yes    ☐ No

---

## PART 2

---

*The following questions are related to the period of time after the outbreak of the novel corona virus in **February 2020**.*

### Travel

1. Did you travel abroad in the past few months?

☐ Yes    ☐ No (*proceed tot he next heading 'Contacts'*)

1a. Which country(s) did you visit?

.....

.....



1b. Was there a travel warning during your stay abroad? (as advised by the government)

☐ Yes    ☐ No

## Contacts

1. Has one of your household members been tested positive for corona?

☐ Yes    ☐ No

2. Did a physician tell one of your household members that he/she probably is/was infected with the corona virus?

☐ Yes    ☐ No

3. Did you have close contact with someone who was tested positive for corona?

*This is about physical meetings, not about meetings on the phone.*

☐ Yes    ☐ No, as far as I know

## Corona related symptoms

1. How do you consider your health in general?

- ☐ Excellent
- ☐ Very good
- ☐ Good
- ☐ Fair
- ☐ Poor

2. Did you suffer from corona-related symptoms in **the last few months since February**?

☐ Yes    ☐ No (*proceed to the next heading 'Diagnose Corona'*)

2a. From which symptom(s) did you suffer? Provide an estimate of the amount of days for each symptom.

☐ Coughing, ..... days

☐ Sneezing, ..... days

☐ Running nose, ..... days

☐ Shortness of breath during exercise, ..... days

☐ Shortness of breath without exercise, ..... days

☐ Sore throat, ..... days

☐ Fever ( $> 38^{\circ}\text{C}$ ), ..... days

☐ Chest pain, ..... days

☐ Diarrhea, ..... days

☐ Nausea, ..... days

☐ Vomit, ..... days

☐ Abdominal pain, ..... days

☐ Sore muscles, ..... days

☐ Joint pain, ..... days

☐ Red, painful or itchy eyes, ..... days

☐ Fatigue, ..... days

☐ Loss of smell or taste, ..... days

☐ Headache, ..... days

## Diagnose Corona

1. Have you been tested for the Coronavirus?

☐ Yes    ☐ No (*proceed to question 2*)

1a. On what date did you receive the corona test (dd/mm/yyyy)?

.....

1b. What was the test result of the Coronatest?

☐ Positive    ☐ Negative    ☐ I do not know

2. Did a physician tell you that you probably have/had corona?

☐ Yes    ☐ No

3. If you had to choose, would you say that you have/had corona?

☐ Yes,  
because.....  
.....  
☐ No

4. Have you been admitted to the hospital due to corona?

☐ Yes    ☐ No

THANK YOU FOR YOUR PARTICIPATION

**Please hand in this questionnaire to your treating physician.**
